# Supplementary material for: An Au/AgBr–Ag heterostructure plasmonic photocatalyst with enhanced catalytic activity under visible light
Source: Royal Society of Chemistry journal article supplement (doi:10.1039/c6dt03723b), 2016-12-15
Supplement: c6dt03723b1.pdf [file c6dt03723b1.pdf]

**Supporting Information**

**Au/AgBr-Ag Heterostructure Plasmonic Photocatalyst with  
Enhanced Catalytic Activity under Visible Light**

**Rahul Purbia and Santanu Paria\***

Interfaces and Nanomaterials Laboratory, Department of Chemical Engineering, National  
Institute of Technology, Rourkela 769 008, India

\*To whom correspondence should be addressed. E-mail: [sparia@nitrrkl.ac.in](mailto:sparia@nitrrkl.ac.in) or  
[santanuparia@yahoo.com](mailto:santanuparia@yahoo.com), Fax: +91 661 246 2999

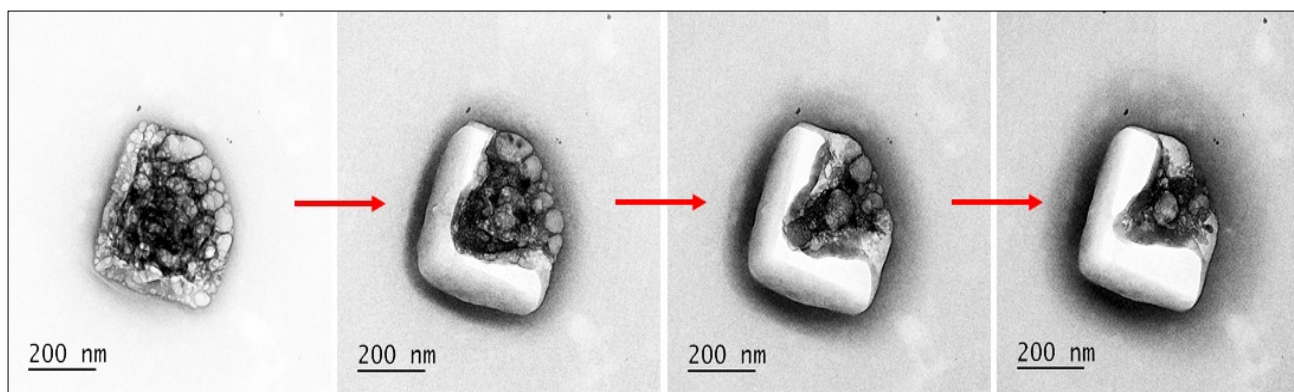

**Figure S1** Structure deformation of Au/AgBr/Ag NPs under high energy electron-beam during TEM analysis.

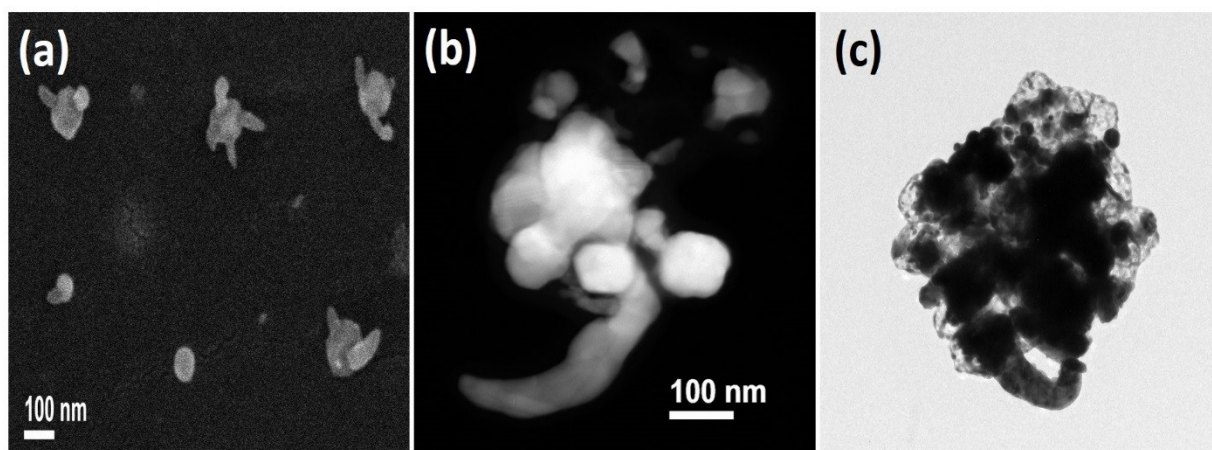

**Figure S2** Structure deformation of Au/AgBr/Ag NPs under high energy electron-beam during (a) FESEM, (b) HADAAAF-STEM, (c) TEM analysis.

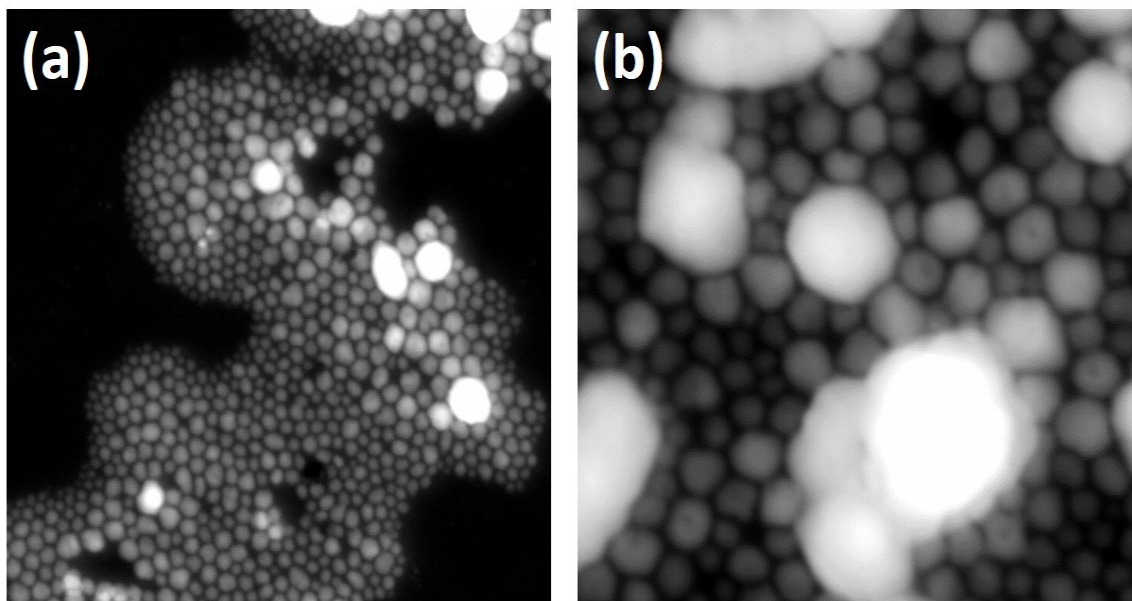

**Figure S3** HADA AF-STEM images of Au/AgBr/Ag NPs.

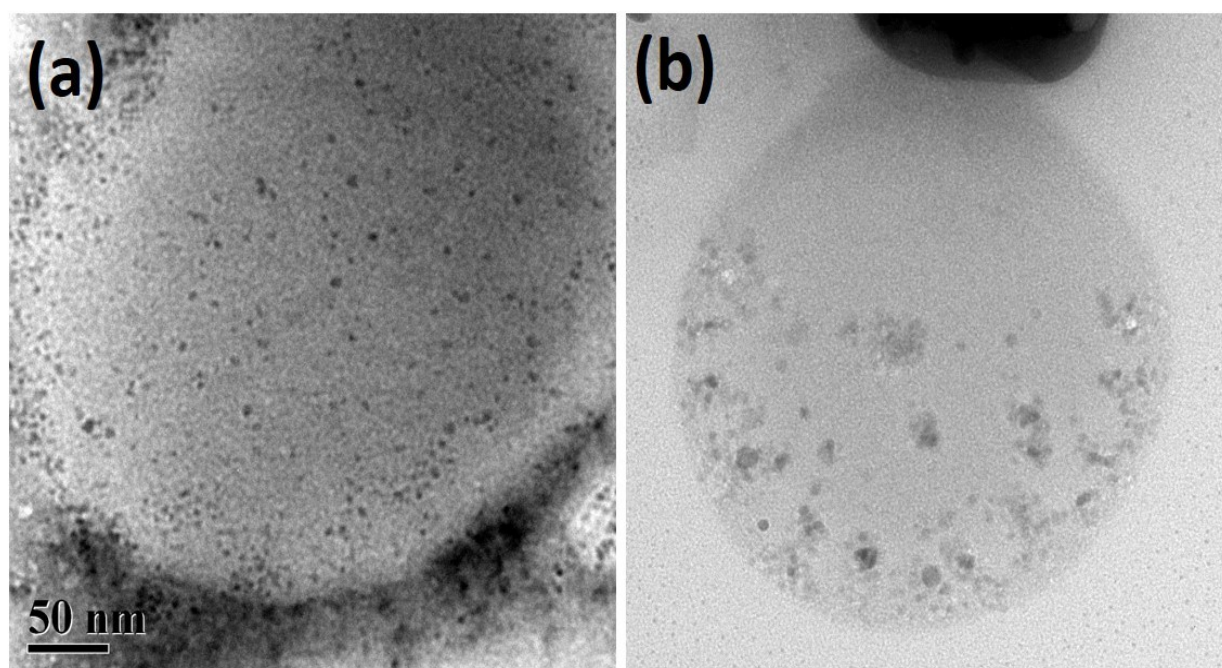

**Figure S4** TEM image of Au NPs distribution inside the AgBr/Ag NPs.
